# Supplementary material for: A 150 years record of polycyclic aromatic compounds in the Sihailongwan Maar Lake, Northeast China: impacts of socio-economic developments and pollution control
Source: Royal Society of Chemistry journal article supplement (doi:10.1039/d4em00309h), 2024-01-01
Supplement: d4em00309h1.pdf [file d4em00309h1.pdf]

## Supporting Online Material for

### **A 150-yr record of polycyclic aromatic compounds in the Sihailongwan Maar Lake, northeast China: impacts of the socio- economic developments and pollution control**

Jianing Zhang<sup>a,b</sup>, Chong Wei<sup>a,c\*</sup>, Yongming Han<sup>a,d,e\*</sup>, Benjamin A. Musa Bandowe<sup>f</sup>  
Dewen Lei<sup>a,b</sup>, Wolfgang Wilcke<sup>g</sup>

<sup>a</sup> State Key Laboratory of Loess, Institute of Earth Environment, Chinese Academy of Sciences, Xi'an 710061, China

<sup>b</sup> University of Chinese Academy of Sciences, Beijing 100049, China

<sup>c</sup> Shanghai Carbon Data Research Center, CAS Key Laboratory of Low-Carbon Conversion Science and Engineering, Shanghai Advanced Research Institute, Chinese Academy of Sciences, Shanghai 201210, China

<sup>d</sup> School of Human Settlements and Civil Engineering, Xi'an Jiaotong University, Xi'an 710049, China

<sup>e</sup> National Observation and Research Station of Regional Ecological Environment Change and Comprehensive Management in the Guanzhong Plain, Xi'an 710061, China

<sup>f</sup> Mainz, Germany

<sup>g</sup> Institute of Geography and Geoecology, Karlsruhe Institute of Technology (KIT), Reinhard-Baumeister Platz 1, 76131 Karlsruhe, Germany

*\* Corresponding author:*

*Yongming Han, e-mail address: [yongming@ieecas.cn](mailto:yongming@ieecas.cn)*

*Chong Wei, e-mail address: [weic@sari.ac.cn](mailto:weic@sari.ac.cn)*

## **S1. Location and site conditions**

Sihailongwan Maar Lake (SHLW) is situated about 20 km southwest of Jingyu County in the southeastern Jilin Province. It is a closed, nearly circular lake (Fig. S1) in the Cenozoic Longgang volcanic area of northeast China. It has a diameter of approximately 750 m, a surface area of around 0.5 km<sup>2</sup>, and a catchment area of about 0.7 km<sup>2</sup> <sup>1</sup>. SHLW has a bowl-shaped basin with a flat lake bottom and a maximum water depth of approximately 50 meters <sup>2</sup>. The lake sits at an elevation of 791 meters above sea level and is encircled by pyroclastic rock walls that rise to a height of roughly 20 meters <sup>2</sup>. The East Asian monsoon climate has a significant impact on the weather patterns throughout the year in SHLW and Jingyu County. Spring is characterized by dry and windy conditions, while summer is hot and rainy. Autumn brings rain and a rapid cooling of temperatures, and winter is long, dry, and cold <sup>3</sup>. The annual temperature and precipitation at Jingyu County meteorological station is 3.25 °C and ~767 mm <sup>4</sup>.

**Table S1.** Blank (ng), method detection limit (LOD) (pg), and reporting limit (RL) of target polycyclic aromatic compounds in this study. Note: n.d. is not detected.

| No. | Analytes                      | MW <sup>a</sup><br>(g mol <sup>-1</sup> ) | MI <sup>a</sup> | QI <sup>a</sup> | LOD <sup>b</sup><br>(pg) | Blank<br>(ng) |
|-----|-------------------------------|-------------------------------------------|-----------------|-----------------|--------------------------|---------------|
| 1   | Naphthalene                   | 128.18                                    | 128             | 127             | 0.18                     | 3.25          |
| 2   | 2-Methylnaphthalene           | 142.2                                     | 142             | 141             | 0.09                     | 1.24          |
| 3   | 1-Methylnaphthalene           | 142.2                                     | 142             | 141             | 0.53                     | 3.20          |
| 4   | 1,3-dimethylnaphthalene       | 156.23                                    | 156             | 141             | 1.36                     | 6.59          |
| 5   | Acenaphthylene                | 152.2                                     | 152             | 151             | 0.25                     | 0.43          |
| 6   | Acenaphthene                  | 154.21                                    | 153             | 154             | 0.89                     | 0.01          |
| 7   | Fluorene                      | 166.22                                    | 166             | 165             | 0.98                     | 1.56          |
| 8   | Phenanthrene                  | 178.24                                    | 178             | 179             | 1.98                     | 3.56          |
| 9   | Anthracene                    | 178.24                                    | 178             | 179             | 1.10                     | 3.36          |
| 10  | 2-Methylphenanthrene          | 192.26                                    | 192             | 191             | 0.67                     | 2.01          |
| 11  | 3,6-Dimethylphenanthrene      | 206.29                                    | 206             | 205             | 1.25                     | 0.35          |
| 12  | Fluoranthene                  | 202.26                                    | 202             | 200             | 0.12                     | 0.56          |
| 13  | Pyrene                        | 202.26                                    | 202             | 200             | 0.18                     | 1.89          |
| 14  | Retene                        | 234.34                                    | 219             | 234             | 1.7                      | 0.98          |
| 15  | Benzo[a]anthracene            | 228.3                                     | 228             | 229             | 0.38                     | 0.76          |
| 16  | Chrysene                      | 228.3                                     | 228             | 229             | 0.22                     | 0.34          |
| 17  | Benzo[b+j]fluoranthene        | 252.32                                    | 252             | 253             | 0.64                     | 0.18          |
| 18  | Benzo[e]pyrene                | 252.32                                    | 252             | 253             | 0.26                     | 0.19          |
| 19  | Benzo[a]pyrene                | 252.32                                    | 252             | 253             | 0.20                     | 0.12          |
| 20  | Perylene                      | 252.32                                    | 252             | 253             | 0.47                     | 0.43          |
| 21  | Indeno[1,2,3-cd]pyrene        | 276.34                                    | 276             | 274             | 0.54                     | 0.15          |
| 22  | Dibenzo[a,h]anthracene        | 278.36                                    | 278             | 279             | 0.79                     | 0.97          |
| 23  | Benzo[g,h,i]perylene          | 276.34                                    | 276             | 277             | 0.43                     | 1.26          |
| 24  | Quinoline                     | 129.16                                    | 129             | 102             | 5.08                     | 0.75          |
| 25  | Benzo[h]quinoline             | 179.22                                    | 179             | 151             | 3.45                     | 0.10.         |
| 26  | Acridine                      | 179.22                                    | 179             | 151             | 4.03                     | 0.12          |
| 27  | Carbazole                     | 167.21                                    | 167             | 139             | 4.01                     | 0.06          |
| 28  | 1-Naphthaldehyde              | 156.19                                    | 156             | 128             | 10.00                    | 0.98          |
| 29  | 9-Fluorenone                  | 180.21                                    | 180             | 152             | 4.26                     | 6.54          |
| 30  | 9,10-Anthraquinone            | 208.22                                    | 208             | 180             | 6.53                     | 5.23          |
| 31  | Benzo[a]florenone             | 230.27                                    | 230             | 202             | 3.67                     | 1.79          |
| 32  | 7H-Benzo[d,e]anthracene-7-one | 230.27                                    | 230             | 202             | 6.79                     | 2.23          |
| 33  | Benzo[a]anthracene-7,12-dione | 258.28                                    | 258             | 230             | 6.58                     | 0.18          |
| 34  | 5,12-naphthacenequinone       | 258.28                                    | 258             | 230             | 5.61                     | 1.58          |

**Table S2.** Minimum, maximum, average concentrations (ng g<sup>-1</sup>) of polycyclic aromatic compounds (PACs) in sediments of the Sihailongwan Maar Lake (SHLW), northeast China.

| Species                                            | Abbreviation | Minimum (Max) | Maximum (Min) | Average | Max/Min |
|----------------------------------------------------|--------------|---------------|---------------|---------|---------|
| <b>Polycyclic aromatic hydrocarbons</b>            |              |               |               |         |         |
| Naphthalene                                        | Naph         | 47.6          | 416           | 142     | 8.7     |
| 2-Methylnaphthalene                                | 2-MNaph      | 35.9          | 289           | 115     | 8.0     |
| 1-Methylnaphthalene                                | 1-MNaph      | 28.1          | 220           | 72.1    | 7.8     |
| 1,3-Dimethylnaphthalene                            | 1,3-DMNaph   | 2.8           | 11.2          | 6.29    | 3.9     |
| Acenaphthylene                                     | Acey         | 1.7           | 55.0          | 11.4    | 33.2    |
| Acenaphthene                                       | Acen         | 4.1           | 38.2          | 13.9    | 9.4     |
| Fluorene                                           | Fluo         | 21.5          | 190           | 60.1    | 8.9     |
| Phenanthrene                                       | Phe          | 47.5          | 456           | 151     | 9.6     |
| Anthracene                                         | Ant          | 2.4           | 44.6          | 11.8    | 18.3    |
| 2-Methylphenanthrene                               | 2-MPhe       | 10.0          | 73.5          | 26.5    | 7.4     |
| 3,6-Dimethylphenanthrene                           | 3,6-DMPhe    | 0.4           | 27.9          | 5.86    | 78.2    |
| Fluoranthene                                       | Flua         | 19.9          | 655           | 159     | 32.9    |
| Pyrene                                             | Pyr          | 13.1          | 482           | 111     | 36.9    |
| Retene                                             | Ret          | 13.3          | 131           | 40.7    | 9.9     |
| Benzo[a]anthracene                                 | BaA          | 2.6           | 157           | 39.2    | 60.5    |
| Chrysene                                           | Chr          | 14.8          | 416           | 106     | 28.1    |
| Benzo[b+j]fluoranthene                             | B(bj)F       | 26.0          | 684           | 191     | 26.3    |
| Benzo[e]pyrene                                     | BeP          | 19.5          | 527           | 148     | 27.0    |
| Benzo[a]pyrene                                     | BaP          | 2.0           | 281           | 47.3    | 139     |
| Perylene                                           | PER          | 36.7          | 228           | 93.9    | 6.2     |
| Indeno [1,2,3-cd]pyrene                            | IcdP         | 1.9           | 370           | 78.6    | 199     |
| Dibenzo[a,h]anthracene                             | DahA         | 0.3           | 78.2          | 15.6    | 244     |
| Benzo[g,h,i]perylene                               | BghiP        | 1.4           | 313           | 67.2    | 220     |
| <b>Oxygenated PAHs</b>                             |              |               |               |         |         |
| 1-Naphthaldehyde                                   | 1-NALD       | 0.3           | 26.6          | 4.6     | 80.7    |
| 9-Fluorenone                                       | 9-Fluo       | 8.5           | 248           | 63.7    | 29.2    |
| 9,10-Anthraquinone                                 | 9,10-AQ      | 1.0           | 108           | 22.7    | 105     |
| Benzo[a]fluorenone                                 | BaFLU        | 0.3           | 178           | 25.6    | 661     |
| 7H-Benzo[d,e]anthracene-7-one                      | BdeAQ        | 1.2           | 73.1          | 10.0    | 59.0    |
| Benzo[a]anthracene-7,12-dione                      | BaAQ         | 3.3           | 59.7          | 17.5    | 18.2    |
| 5,12-Naphthacenequinone                            | 5,12-NQ      | 0.2           | 22.4          | 4.1     | 107     |
| <b>Azaarenes</b>                                   |              |               |               |         |         |
| Benzo[h]quinoline                                  | BhQ          | 1.3           | 201           | 16.4    | 155     |
| Acridine                                           | ACR          | 0.8           | 34.2          | 8.2     | 42.2    |
| Quinoline                                          | QUI          | 0.1           | 315           | 30.9    | 2628    |
| Carbazole                                          | CAR          | 0.6           | 125           | 21.9    | 212     |
| Sum of azaarenes                                   | ∑4AZAs       | 4.7           | 500           | 77.3    | 106     |
| Sum of oxygenated PAHs                             | ∑7OPAHs      | 35.8          | 639           | 148     | 17.9    |
| Sum of 25PAHs                                      | ∑25PAHs      | 527           | 5240          | 1714    | 9.9     |
| ∑PAHs without perylene                             | ∑24PAHs      | 381           | 5182          | 1620    | 13.6    |
| ∑7OPAHs/∑24PAHs                                    |              | 0.05          | 0.43          | 0.13    | 8.6     |
| Low molecular weight parent PAHs                   | LMW-PAHs     | 131           | 1062          | 390     | 8.1     |
| High molecular weight parent PAHs without perylene | HMW-PAHs     | 117           | 3797          | 964     | 32.4    |
| LMW-PAHs/HMW-PAHs                                  |              | 0.23          | 2.05          | 0.71    | 8.9     |
| ∑COM-PAHs <sup>1</sup>                             |              | 122           | 3212          | 849     | 26.2    |
| ∑COM-PAHs/∑24PAHs                                  |              | 0.22          | 0.64          | 0.45    | 2.95    |

<sup>1</sup> ∑COM-PAHs: Combustion-derived PAH = sum of Flua, Pyr, BaA, Chr, BeP, BaP, IcdP, BghiP, B(bj)F, and DahA.



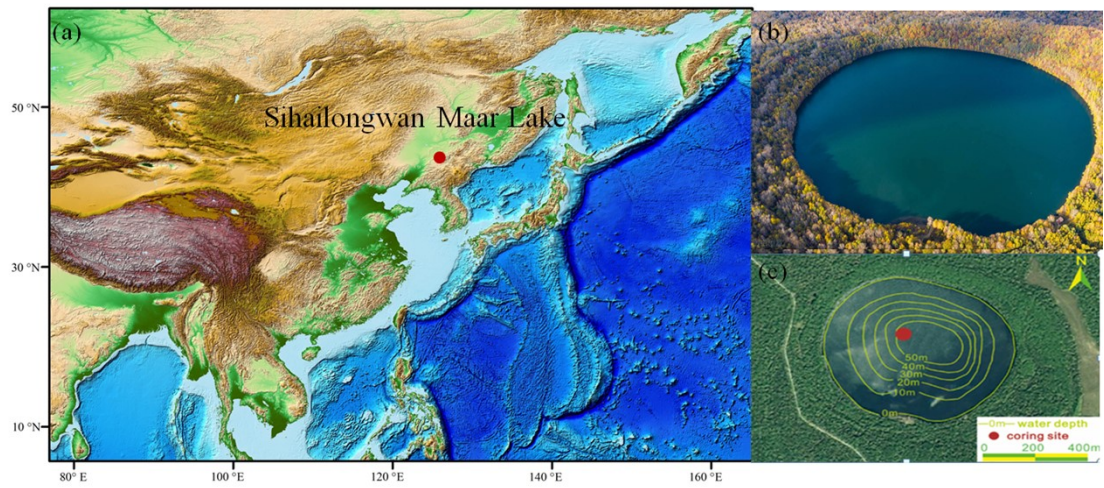

**Fig. S1.** Location of Sihailongwan Maar Lake (SHLW) in northeast China (a). Aerial view of SHLW and its forested catchment (b). The sampling location in the lake (c) according to Han et al.,<sup>8</sup>.

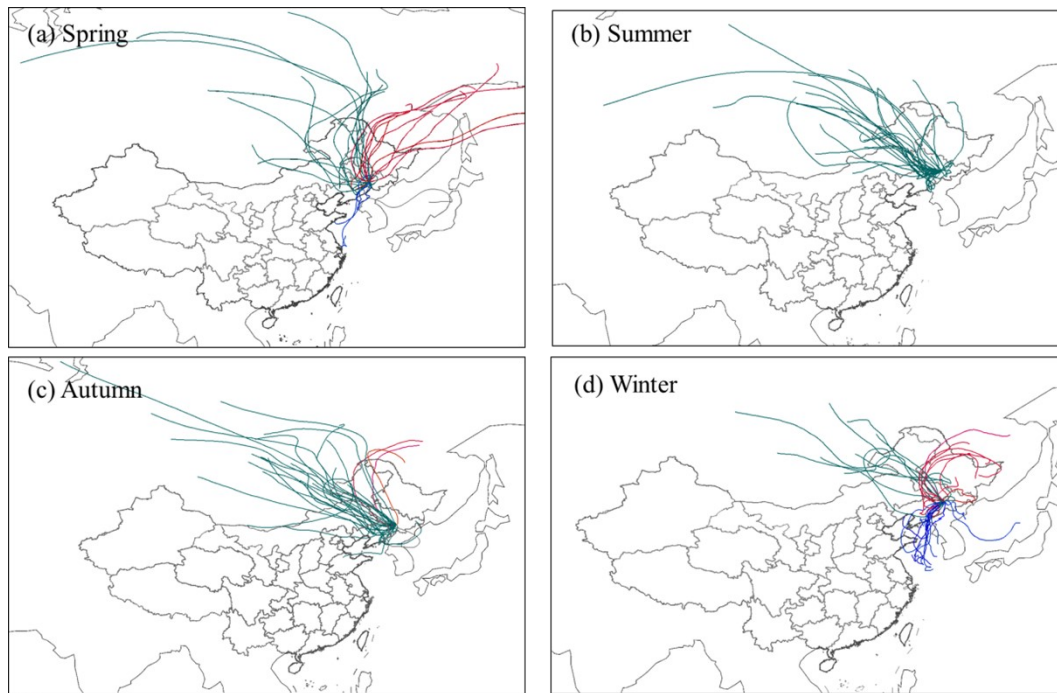

**Fig. S2.** 72-hour backward air mass trajectories passing over Sihailongwan Maar Lake (SHLW) in (a) spring (April); (b) summer (June); (c) autumn (October); and (d) winter (January) 2020 (produced using the NOAA ARL website: [www.arl.noaa.gov/ready/](http://www.arl.noaa.gov/ready/)). The trajectories are divided into northeasterly air mass inflow (red) from Russia's far East, southeasterly inflow (blue) from East Asia, and northwesterly inflow (green) from northern Mongolia.

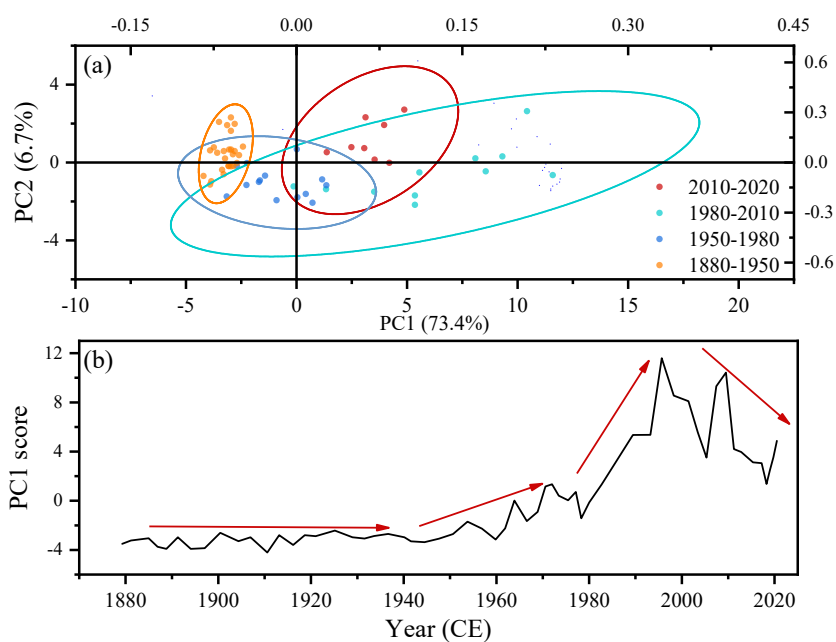

**Fig. S3** PCA (Principal Component Analysis analyses) of PAHs (a) Classification of temporal variations based on the scores of PCA (principle component analysis) components PC1 (principal component 1, the dominant component) and PC2 (principal component 2); (b) temporal variations of PC1 in SHLW sediment core.



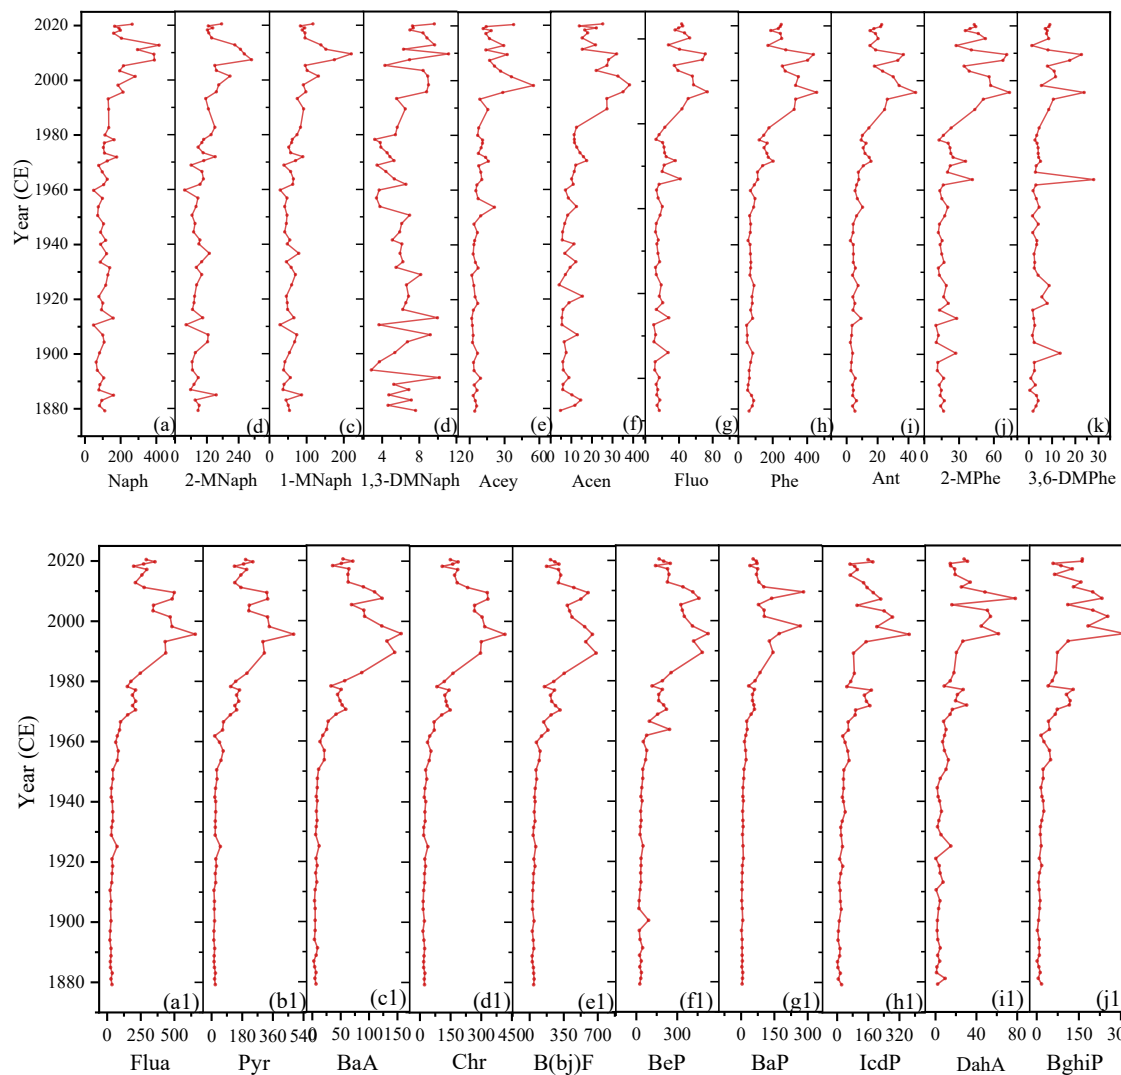

**Fig. S4** Vertical distribution of PAH concentration (ng g<sup>-1</sup>) in the SHLW sediment core. The abbreviations are explained in Table S2.

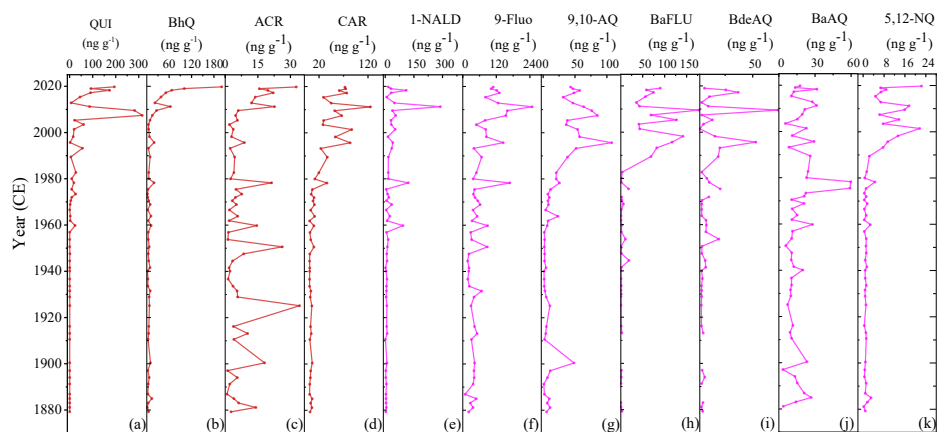

**Fig. S5** Vertical distribution of the concentrations and fluxes of AZAs and OPAHs in the SHLW sediment core. The abbreviations are explained in Table S2.

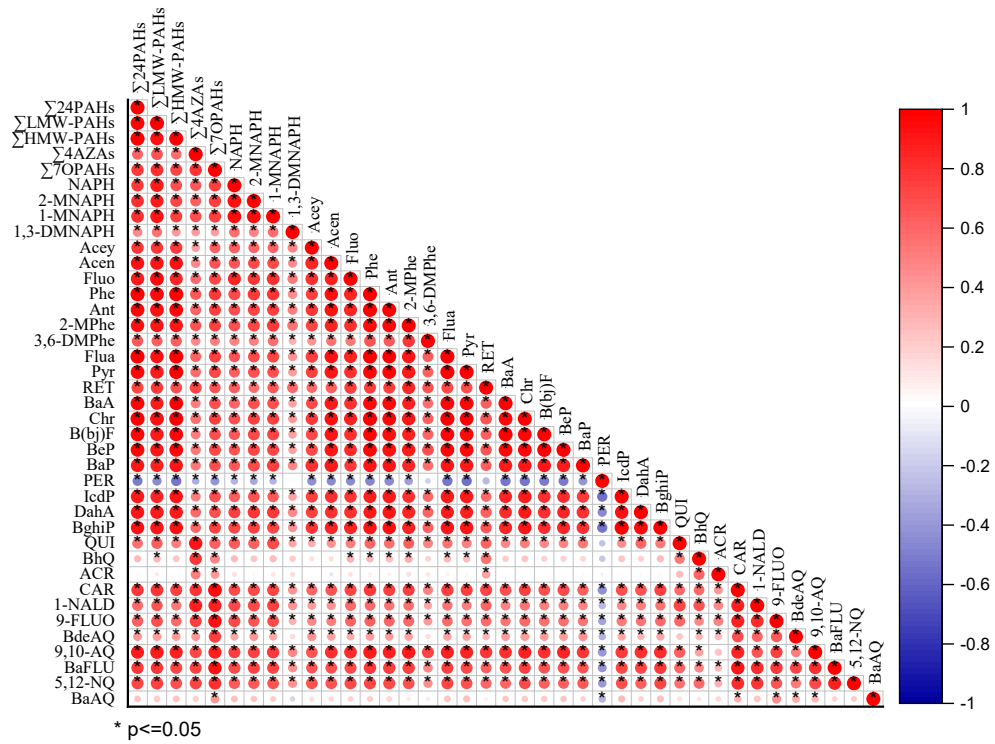

**Fig. S6** Spearman correlation of PAHs, OPAHs, and AZAs in the Sihailongwan Maar Lake (SHLW). Color represents the correlation coefficient.

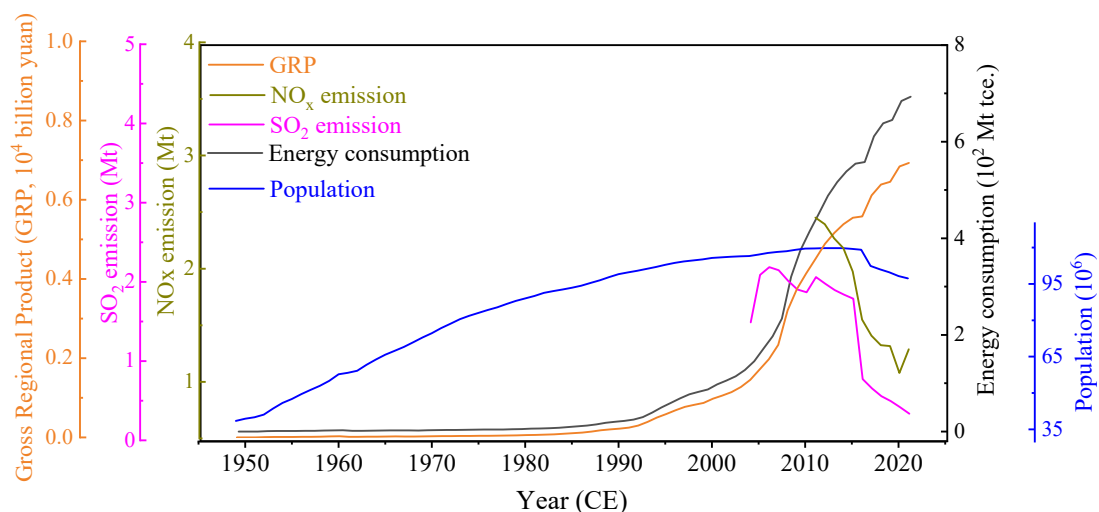

**Fig. S7** Temporal curves of the SO<sub>2</sub> and NO<sub>x</sub> emissions, energy consumption, Gross Regional Product (GRP), and population in northeast China. Data were obtained from National Data from National Bureau of Statistics (<https://data.stats.gov.cn/index.htm>).

## References

1. Y. F. Guan, J. L. Sun, H. G. Ni and J. Y. Guo, Sedimentary record of polycyclic aromatic hydrocarbons in a sediment core from a maar lake, Northeast China: evidence in historical atmospheric deposition, *J. Environ. Monit.*, 2012, **14**, 2475-2481.
2. Q. Liu, J. Liu, X. Chen, H. You, G. Chu, J. Han, J. Mingram, G. Schettler and J. F. W. Negendank, Stable carbon isotope record of bulk organic matter from the Sihailongwan maar lake, northeast china during the past 18.5ka (in Chinese), *Quaternary Sci.*, 2005, **25**, 711-721.
3. Q. Sun, G. Q. Chu, M. M. Xie, Y. Ling, Y. L. Su, Q. Z. Zhu, Y. B. Shan and J. Q. Liu, Long-chain alkenone-inferred temperatures from the last deglaciation to the early Holocene recorded by annually laminated sediments of the maar lake Sihailongwan, northeastern China, *The Holocene*, 2018, **28**, 1173-1180.
4. D. Yan, M. Picard, Y. Han, Z. An, D. Lei, X. Zhao, L. Zhang and E. Capo, Sedimentary DNA reveals phytoplankton diversity loss in a deep maar lake during the Anthropocene, *Limnol. Oceanogr.*, 2024, **n/a**.
5. I. C. T. Nisbet and P. K. Lagoy, Toxic equivalency factors (TEFs) for polycyclic aromatic hydrocarbons (PAHs), *Regul. Toxicol. Pharm.*, 1992, **16**, 290-300.
6. J. L. Durant, W. F. Busby Jr, A. L. Lafleur, B. W. Penman and C. L. Crespi, Human cell mutagenicity of oxygenated, nitrated and unsubstituted polycyclic aromatic hydrocarbons associated with urban aerosols, *Mutat. Res.*, 1996, **371**, 123-157.
7. J. Collins, J. Brown, G. Alexeeff and A. Salmon, Potency equivalency factors for some polycyclic aromatic hydrocarbons and polycyclic aromatic hydrocarbon derivatives, *Regul. Toxicol. Pharmacol.*, 1998, **28**, 45-54.
8. Y. M. Han, Z. S. An, D. W. Lei, W. J. Zhou, L. Y. Zhang, X. Zhao, D. N. Yan, R. Arimoto, N. L. Rose, S. L. Roberts and L. Li, The Sihailongwan maar lake, northeastern china as a candidate global boundary stratotype section and point for the anthropocene series, *Anthropocene. Rev.*, 2023, **10**, 177-200.
